# Supplementary material for: A Novel Role for the RNA–Binding Protein FXR1P in Myoblasts Cell-Cycle Progression by Modulating p21/Cdkn1a/Cip1/Waf1 mRNA Stability
Source: PLoS Genet. 2013 Mar 21;9(3):e1003367. doi: 10.1371/journal.pgen.1003367 (PMC3605292; doi:10.1371/journal.pgen.1003367)
Supplement: Table S3 — Prediction of G-quadruplexes present in human Cdk15 mRNA using QGRS webtool. G-quadruplexes displaying the highest scores are localized in the 5′UTR or coding sequence of the mRNA. (XLSX) [file pgen.1003367.s006.xlsx]

## Sheet: SI Tab. 3
NM_001261435| Homo sapiens cyclin-dependent kinase 15 (CDK15), mRNA
mRNA length: 3672 nts
coding sequence: 87-1365 nts
QGRS analysis results:
Position	Length	QGRS	G-Score	Location
25	18	GGATAGGAGAGGCAGTGG	20	5'UTR
149	25	GGGAGGCGAGGCACACAGCTGTCGG	11	coding sequence
329	21	GGAAGAGGATCTGAGGCAGGG	18	coding sequence
929	18	GGACATATGGGGTGCAGG	15	coding sequence
1016	24	GGAGAAAATCTGGGAGGTGCTGGG	14	coding sequence
1138	18	GGAACAGGCTGGGCAGGG	20	coding sequence
2093	27	GGAATCTAAGCGCTGGTTTGATGGTGG	10	3'UTR
3274	22	GGAGGGATTCCCATGTTGGAGG	11	3'UTR
